# 1 Changes in the abundance of Danish 2 orchids over the past 30 years

---

3 Christian Damgaard, Jesper Erenskjold Moeslund, Peter Wind

4 Department of Bioscience, Aarhus University, Denmark

## 5 **Abstract**

6 Orchid abundance data collected during the past 30 years from 440 sites within the National Orchid  
7 Monitoring Program were analysed to quantify the population trends of orchids in Denmark, and the  
8 underlying reasons for the observed population trends were analysed and discussed. Twenty of the 45  
9 monitored Danish orchids showed a significant decrease in abundance over the past 30 years (16, if only  
10 orchids with at least 50 observations each are selected), thus corroborating the previous observations of  
11 declining orchid abundances at European scale. Generally, there was a significant negative effect of  
12 overgrowing with tall-growing herbs and shrubs on the abundance of Danish orchids.

13

14 *Keywords:* Danish orchid species, Danish Red List, National Orchid Monitoring Program, Danish Orchid  
15 Database, citizen science, monitoring, vegetation, population size, population trend, plant abundance,  
16 plant diversity, pressures on orchid sites

## 17 **Introduction**

18 Orchids are generally in decline globally (Kull & Hutchings 2006; Tali et al. 2006; Vogt-Schilb et al. 2015). In  
19 Denmark, 33 taxa out of 51 species, subspecies and varieties of orchids (see Table 1) are assessed as either  
20 extinct, threatened or near threatened on the Danish Red List (Wind 2019). In this study, we use orchid  
21 abundance data collected during the 30 years between 1987 and 2016 from 440 sites within the National  
22 Orchid Monitoring Program to quantify the population trends of orchids in Denmark. Additionally, we  
23 analyse and discuss underlying reasons for the observed population trends.

24 In Northern Europe, orchids typically grow in woodlands, both broad-leaved forests and old conifer  
25 plantations, dry grasslands and heathlands, rich and poor fens, meadows and dune slacks (Pedersen &  
26 Faurholdt 2010). Sometimes, orchids also colonize abandoned marl and lime pits, but avoid saline marshes,  
27 arid white dune areas and intensively managed farmlands (Pedersen & Faurholdt 2010). The soil's structure  
28 and texture, hydrology, pH, mycorrhiza availability and composition of nutrients are important ecological  
29 factors that characterize suitable habitats for orchids (Djordjević et al. 2016; Hemrová et al. 2019;  
30 McCormick & Jacquemyn 2014; van der Heijden et al. 2015). Furthermore, light conditions, the degree of  
31 disturbance and, for some orchids, the presence of specific pollinators play important roles for habitat  
32 suitability (Pedersen & Faurholdt 2010; Schiestl 2005).

33 Most orchids in Northern Europe have declined because of habitat loss or habitat degradation, for example  
34 as a result of secondary succession following abandonment of former farming practises such as extensive  
35 grazing and hay cutting (Kull & Hutchings 2006; Mattiasson 1986; Schrautzer et al. 2011). The secondary  
36 succession can accelerate by changed interspecific competitive regimes following increased soil nutrient  
37 availability due to fertilizers and airborne nitrogen pollution (Ejrnæs et al. 2003). Other land use changes,  
38 such as urbanization, infrastructural constructions, lowering of the groundwater table, draining and  
39 cultivation, are equally important causes of orchid habitat loss (Kull & Hutchings 2006; Mattiasson 1986). In  
40 some cases, overgrazing can also constitute a threat to orchids (Catorci et al. 2013), e.g. by preventing seed  
41 development. In forests, many orchids grow in areas that have been left untouched for decades, and if the  
42 forests are disturbed, e.g. drained, clear-cut or fertilized, then orchids are at risk of disappearing (Whigham  
43 2004). Despite being protected by law in many countries including Denmark (Miljøministeriet 2016),  
44 orchids are regularly picked for flower bouquets or dug up for gardening or trade, actions that both affect  
45 the fitness of an orchid population. For instance, three entire clones of *Cypripedium calceolus* were dug up  
46 from the Danish population of at Buderupholm in 2012 and moved from the fence that had been raised in  
47 order to protect the population, and in 2016, approximately 40 flowering shoots were picked from the

48 population (Himmerland Forest Department, pers.com. 2012, 2016). Additional, general public disturbance  
49 and outdoor activities, such as hiking, camping, and picnicking, may also affect orchid populations  
50 negatively (Handley & Heidel 2005; Kull 1999; Rocchio et al. 2006; Stewart 1989, 1996; Wood et al. 1984).  
51 For example, an *Epipactis leptochila* population at a slope on Møns Klint possibly went extinct due to the  
52 playing of children (N. Faurholdt, pers.com 1996). Many orchid species are specialists, depending on only  
53 one or a few pollinators or mycorrhizal symbiont species (Phillips et al. 2011a; Rasmussen 1995). This can  
54 explain why orchids are intrinsically rare (Phillips et al. 2011b), but has probably also given orchids their  
55 reputation for being good indicators of intact or high-value nature (e.g. Laroche et al. 2012; Newman 2009).

56 The monitoring of orchid species provides a good basis for effective management and conservation of  
57 native orchid populations and their habitats, which is a complicated task due to the orchid species' complex  
58 ecology and the many and varied threats mentioned above. The annual collecting of information on orchid  
59 populations and the condition of their habitats for the National Orchid Monitoring Program is a way to  
60 achieve such adequate data that are useful for planning of management and conservation tasks and to  
61 describe the trend of the Danish orchid species. Besides, the program is an excellent example of an ongoing  
62 citizen science project, where Danish orchids have been monitored annually for more than 30 years from  
63 440 selected orchid sites. The National Orchid Monitoring program is, to our knowledge, the most  
64 comprehensive and long-lived field-based orchid monitoring project in the world comprising many Danish  
65 members of the orchid family (see Appendix A for a detailed account of citizen science in Denmark).

66 Internationally, there are a few examples of long-term orchid monitoring programs of comparable duration  
67 as the monitoring of the Danish population of *Cypripedium calceolus*. One example is the annual census of a  
68 population of *Anacamptis pyramidalis* in a Dutch dune area that started in 1940 (Sterk 1976). The annual  
69 census has been continuously conducted until at least 1975, except for the World War years 1943, 1944 and  
70 1945 (Sterk 1976). Another example is the Swedish ecologist, C.O. Tamm (1919-2007), who laid out the first  
71 plot in 1942 in a population of *Dactylorhiza sambucina* in order to document the effect of picking orchids  
72 (Tamm 1991). The annual Swedish census also involved other orchid species, *Dactylorhiza incarnata*,  
73 *Neottia ovata* and *Orchis mascula*. The monitoring seems to have ended in 1990. Additionally, long-time  
74 monitoring has been performed on *Orchis anthropophora* (L.) All. 1967-1980 (Wells 1981), *Dactylorhiza*  
75 *majalis* subsp. *integrata* 1973-1985 (syn. *D. praetemissa*), (Vanhecke 1988; Vanhecke 1991), *Dactylorhiza*  
76 *sambucina* 1968-1985 (Mattiasson 1986), *Orchis mascula* 1960-1970 (Willems 1989), *O. militaris* 1947-1962  
77 (Farrell 1991; Waite & Farrell 1998), *O. palustris* (Högström 1991), and *Spiranthes spiralis* (Salkowski 1990;  
78 Wells 1981). Kull (2002) has made an overview of long-term field-based studies on population dynamics of

79 terrestrial orchids. The overview comprises 66 orchids with information on the ways of performing the  
80 monitoring: 1) monitoring in permanent plots, 2) counting of specimens in populations, 3) genet dynamics,  
81 where individuals are mapped, 4) measurement of fruit set, and 5) morphometrical parameters analysed. A  
82 characteristic feature of these studies is that they are generally short-termed compared to the National  
83 Orchid Monitoring Program and most studies only monitor a single species.

84 In our study, we analyse the data of The National Orchid Monitoring Program and report on the observed  
85 trends for the monitored orchids. Furthermore, we link the observed changes in orchid abundance to four  
86 observed potential pressures acting on orchid populations.

## 87 **Materials and Methods**

### 88 **Orchid taxa in Denmark**

89 Fifty one terrestrial orchids have been recorded in Denmark (Pedersen & Faurholdt 2010) and belong to 10  
90 boreal genera of the orchid family (*Orchidaceae*). All of them are native to the Danish flora and comprise 31  
91 species, 13 subspecies and 7 varieties. Two species, *Ophrys apifera* and *Orchis militaris*, recently appeared  
92 in Denmark in 2004 and 1981, respectively.

93 Undoubtedly, the Danish orchids belong to the most threatened group of vascular plants in the Danish  
94 flora. Thirty-three out of 51 (65 %) of the Danish orchids assessed for the Danish Red List (Wind 2019) are  
95 either extinct, threatened or near threatened by extinction based on the IUCN Red List Assessment  
96 methodology (IUCN 2012). Eight orchids are categorized Critical Endangered (CR), seven Endangered (EN),  
97 seven Vulnerable (VU) and eight Near Threatened (NT). Sixteen orchids are categorized Least Concern (LC),  
98 while two have not yet been assessed. Two species and one subspecies are now Regionally Extinct (RE) in  
99 Denmark (Table 1) (Wind 2019).

100 In the following, the term 'orchid/orchids' refers to taxa both on species and subspecies level unless  
101 anything else is specified, while the nomenclature follows Pedersen & Faurholdt (2010).

### 102 **Orchid censuses in Denmark**

103 The census of Danish orchid populations started long before the onset of the National Orchid Monitoring  
104 Program in 1987. *Cypripedium calceolus* was recorded for the first time in Denmark Rold Skov, a forest in  
105 Jutland, in 1884. The annual census of the population started in 1943 and has continued since then, except

106 for the year 1946 (Fig. 1). The monitoring of orchids expanded in the beginning of the 1980'ties, where  
107 three Danish counties commenced to perform an annual census of local populations of orchids such as  
108 *Anacamptis morio*, *Dactylorhiza maculata* subsp. *fuchsii*, *Dactylorhiza majalis*, *Epipactis palustris*,  
109 *Gymnadenia conopsea* and *Liparis loeselii*. In parallel, amateurs started regular annual censuses of selected  
110 populations of some of the rarest Danish orchids, e.g. *Anacamptis pyramidalis*, *Epipactis leptochila*,  
111 *Epipogium aphyllum* and *Pseudorchis albida* (Fig. 2).

112 The annual census of 18 Danish orchids was performed, including the populations of orchids that had  
113 already been monitored, as mentioned above, at the start of the National Orchid Monitoring Program. The  
114 annual census was continued for 14 of the 18 orchids throughout the first 30 years of the program. In 1989  
115 and in 1990, four additional orchids were included in the program, of which the annual censuses were  
116 performed for one of them, *Epipactis phyllanthes*, during the rest of the period. For the three other orchids,  
117 the censuses of *Epipactis atrorubens* and *Neottia cordata* ended in 2009 and 2011, respectively, and those  
118 of *Epipactis helleborine* subsp. *neerlandica* were performed more irregularly on different sites (Fig. 2). The  
119 annual censuses of *Ophrys apifera* started in 2004, the year when the orchid species was observed for the  
120 first time in Denmark. Thus, 45 Danish orchids (30 species, 9 subspecies, and 6 varieties) have been  
121 monitored either continuously (31 orchids) or more irregularly. The latter was either because monitoring  
122 stopped (10 orchids) during the period 1987-2016 or since their first inclusion in the program. A full  
123 overview of the monitored orchids and their census periods can be found in Table 1 and Figure 2,  
124 respectively.

125 Two Danish orchid species, *Cypripedium calceolus* and *Liparis loeselii*, are included in the European Union  
126 Habitats Directive Annex 2 (EU 1992), and all known Danish populations of the two species have been  
127 monitored annually since the onset of the national monitoring program for species, terrestrial and aquatic  
128 nature in 2004.

## 129 **Orchid abundance data**

130 Local volunteers are of great importance in the National Orchid Monitoring Program as they perform the  
131 annual census of selected orchid populations. The surveyors in the program also include paid field-  
132 biologists. All participants possess an in-depth knowledge of the orchids. Not all Danish orchid sites were  
133 included in the program; many sites were selected in close distance to the surveyors' residences or they  
134 were selected based on their knowledge of the locations of the most important local populations. Only sites  
135 with more than 30 flowering orchid shoots at the start of the program were included (Løjtntant 1991). On

136 many sites, different orchids grow together, e.g. on fen sites comprising the two orchid species  
137 *Dactylorhiza incarnata* and *D. majalis*. In such instances, both species were monitored. At each of the  
138 selected 440 sites, the number of flowering shoots, either at the whole site or at a permanent plot within  
139 the site, were counted in the flowering season. A sub-sample of the collected abundance data is illustrated  
140 for four orchids (Fig. 3).

141 The surveyors also estimated the intensity of grazing, forest management, overgrowing with tall-growing  
142 herbs and shrubs and public disturbance at the orchid sites by using a four-step classification of the  
143 pressures, i.e. 1) none, 2) weak, 3) moderate and 4) hard or strong (Wind 1999).

144 Further details on the National Orchid Monitoring Program are compiled in Appendix B.

145 On August 8, 2019, the existing 9,688 records (observations) of flower numbers from 874 Danish orchid  
146 populations at the 440 orchid sites as well as 3,337 records on pressures had been retrieved from the  
147 Danish Orchid Database and provide the basis for the present analysis.

## 148 **Statistical analysis**

149 The observed changes in orchid species abundances were modelled based on the recorded flower  
150 numbers, and since the data structure was irregular, it was decided to model the change in abundance by a  
151 state-space model, where the species abundance at a specific site  $i$  at time  $t$  was modelled by latent  
152 variables,  $x_{i,t}$ . The observed abundance is denoted by  $y_{i,t}$  and assumed to be Poisson distributed with the  
153 latent variables as the mean parameters,  $y_{i,t} \sim \text{Poisson}(x_{i,t})$ . The change in the log-transformed  
154 abundance was modelled by two linear models,

$$155 \log(x_{i,t}) = \alpha + \vartheta_i + \beta t \quad (1),$$

$$156 \log(x_{i,t}) = \alpha + \vartheta_i + (\beta + \delta_i) t \quad (2),$$

157 where  $\alpha$  is the intercept and  $\beta$  is the mean annual change. The random effects of site and site \* years are  
158 modelled by  $\vartheta_i$  and  $\delta_i$ , respectively, and both are assumed to be normally distributed. The two linear  
159 models differ in whether the random effect of site \* years is included or not, i.e. whether the change in  
160 abundance varies among sites. Due to the log-transformation, the estimated doubling time of a population  
161 may be calculated as  $\log(2)/\beta$  or  $\log(2)/(\beta + \delta_i)$  in model 1 and 2, respectively.

162 The models were fitted in a Bayesian framework using integrated nested Laplace approximation (Rue et al.  
163 2009). The implementation of the two models in R is shown in Appendix D and follows Blangiardo et al.  
164 (2013). The two models were compared by DIC (Spiegelhalter et al. 2002), and statistical inferences were  
165 made using the 95% credible interval of the parameter of interest.

166 In order to investigate possible causal relationships between the abiotic environment and the observed  
167 site-specific changes in abundance, the estimated site-specific random time coefficients,  $\delta_i$ , of model 2  
168 were regressed against the mean values of the four estimated pressures at each site with species as a  
169 random effect. Again, this model was fitted in a Bayesian framework using integrated nested Laplace  
170 approximation (Rue et al. 2009).

## 171 **Results**

172 Generally, the two linear models (1 and 2) gave the same qualitative results, i.e. the estimated trends,  $\beta$ ,  
173 had approximately the same credibility interval. However, model 2 better supported the abundance data  
174 for the majority of the orchid species (Table 2), i.e. for most species the rate of change differed significantly  
175 among sites.

176 Eighteen of the 41 orchids showed a significant decrease in abundance, while two, *Epipactis helleborine*  
177 subsp. *neerlandica* and *Ophrys insectifera*, showed a significant increase in abundance. The abundance of  
178 the remaining 21 orchids did not show a significant change (Table 2). In order to ensure that the reported  
179 trends are general in both time and space and not due to extraordinary years or sites with uncharacteristic  
180 management practices, we added the supplementary constraint that at least 50 observations were needed  
181 for making robust and general inferences on the change in orchid abundance. Under this added constraint,  
182 16 orchids showed a significant decrease, while none were found to be increasing (Table 2). In figure 3, the  
183 population decrease for four of the monitored orchids is illustrated.

184 The effects of the estimated pressures on the change in abundance are shown in Table 3. Generally, there  
185 was a significant negative effect of overgrowing with tall-growing herbs and shrubs on the abundance of  
186 orchids. The effects of the remaining three pressures were not statistically significant.

187 In Figure 4, the results of three of the more noticeable changes in orchid abundance are presented. The  
188 orchids *Anacamptis morio*, *Dactylorhiza sambucina* and *Herminium monorchis* all show a significant  
189 decreasing abundance, which may be explained by a typical land use change from extensive grazing,

190 especially with cattle and hay-making, towards more intensive farming practices with the use of fertilisers.  
191 Notice also that the chosen linear trend model does not always, provide an adequate description of the  
192 observed trends, e.g. in the case of *Herminium monorchis*.

## 193 Discussion

194 Twenty of the 45 monitored Danish orchids showed a significant decrease in abundance over the past 30  
195 years (16, if only orchids with at least 50 observations were selected), thus corroborating the previous  
196 observations of declining orchid abundances at European scale (Kull & Hutchings 2006; Tali et al. 2006;  
197 Vogt-Schilb et al. 2015). Thirteen of the declining 16 orchids are nationally red-listed (Wind 2019), status in  
198 parenthesis): *Anacamptis morio* (NT), *Corallorhiza trifida* (VU), *Dactylorhiza sambucina* (EN), *Epipactis*  
199 *atrorubens* (NT), *E. leptochila* (NT), *E. palustris* (NT), *Gymnadenia conopsea* subsp. *conopsea* (CR),  
200 *Hammarbya paludosa* (EN), *Orchis purpurea* (NT), *Platanthera bifolia* subsp. *bifolia* (NT), *P. bifolia* subsp.  
201 *latiflora* (EN), *Platanthera chlorantha* (NT) and *Pseudorchis albida* (CR) (Table 1).

202 Seven threatened orchids did not show a significant decrease in abundance: *Cephalanthera damasonium*  
203 (VU), *C. longifolia* (EN), *C. rubra* (CR), *Cypripedium calceolus* (VU), *Herminium monorchis* (EN) and *Liparis*  
204 *loeselii* (EN). Furthermore, the result of the analysis show a significant decrease in abundance among seven  
205 orchids categorized Least Concern (LC): *Dactylorhiza incarnata* subsp. *incarnata*, *D. maculata* subsp. *fuchsii*,  
206 *Epipactis phyllanthes*, *E. purpurata*, *Neottia ovata*, *N. nidus-avis* and *Orchis mascula*. However, all these  
207 orchids still have a relatively large geographical distribution within Denmark (Hartvig 2015).

208 According to our analyses, the observed general decline in orchid abundance may be partially caused by  
209 overgrowth with tall-growing herbs and shrubs caused by changes in the traditional farmland-use. This  
210 inference is corroborated by the results from Timmermann et al. (2015), who found that reduced livestock  
211 grazing most likely was an important factor in explaining the decline in abundance of some plant species.

212 Many orchids have relatively complex life-cycles and quite narrow ecological requirements for their habitat.  
213 A number of orchid species are pollinated by one or two insect species (Joffard et al. 2019), but most are  
214 pollinated by a more diverse insect fauna. For instance, *Ophrys insectifera* are pollinated by males of the  
215 digger wasps *Argogorytes mystaceus* and *A. frageii*, while the flowers of *Cypripedium calceolus* are  
216 pollinated by females of the genus *Andrena* and *Halictidae* (Pedersen & Faurholdt 2010). Hence, the decline  
217 in such insects could also explain the decline in their dependent orchid species. Also, most orchid species  
218 depend on certain mycorrhizae to germinate and thrive and are therefore prone to reduction in the



219 availability of these fungal relationships. For example, a recent study showed that the landscape-scale  
220 distribution of four European orchid species, *Cephalathera rubra*, *Epipactis atrorubens*, *E. helleborine* and  
221 *Neottia nidus-avis*, are primarily restricted by availability of fungal associates (Hemrová et al. 2019). We  
222 have not included such relationships in our analysis of pressures, as the surveyors did not collect  
223 mycorrhizal information, but we highly recommend that future studies pursue this and shed more light on  
224 the role of pollinators and mycorrhiza for the decline in orchid abundances.

## 225 **Acknowledgements**

226 We sincerely thank all the surveyors (see Appendix C) of the National Orchid Monitoring Program for  
227 collecting the data used here and the Danish foundation '15. Juni Fonden' for economic support for the  
228 analysis of the collected data.

## 229 Tables

230 Table 1. The 51 orchids recorded in Denmark, their taxonomic level (Pedersen & Faurholdt 2010), Danish  
 231 Red List status (Wind 2019) and period of monitoring of 45 orchids in the National Orchid Monitoring  
 232 Program. Red List Categories: RE = Regionally Extinct. CR = Critically Endangered. EN = Endangered. VU =  
 233 Vulnerable. NT = Near Threatened. LC = Least Concern. NE = Not Evaluated.

| International name                                                                                                                                                            | Taxon level | Stat<br>202 |
|-------------------------------------------------------------------------------------------------------------------------------------------------------------------------------|-------------|-------------|
| <i>Anacamptis morio</i> (L.) R.M. Bateman, Pridgeon & M.W. Chase                                                                                                              | Species     | NT          |
| <i>Anacamptis pyramidalis</i> (L.) Rich.                                                                                                                                      | Species     | VU          |
| <i>Cephalanthera damasonium</i> (Mill.) Druce                                                                                                                                 | Species     | VU          |
| <i>Cephalanthera longifolia</i> (L.) Fritsch                                                                                                                                  | Species     | EN          |
| <i>Cephalanthera rubra</i> (L.) Rich.                                                                                                                                         | Species     | CR          |
| <i>Coeloglossum viride</i> (L.) Hartm.                                                                                                                                        | Species     | RE          |
| <i>Corallorhiza trifida</i> Châtel                                                                                                                                            | Species     | VU          |
| <i>Cypripedium calceolus</i> L.                                                                                                                                               | Species     | VU          |
| <i>Dactylorhiza incarnata</i> (L.) Soó subsp. <i>incarnata</i>                                                                                                                | Subspecies  | LC          |
| <i>Dactylorhiza incarnata</i> (L.) Soó subsp. <i>lobelii</i> (Verm.) H.A. Pedersen                                                                                            | Subspecies  | VU          |
| <i>Dactylorhiza incarnata</i> (L.) Soó subsp. <i>incarnata</i> var. <i>ochroleuca</i> (Boll) Hyl.                                                                             | Variety     | EN          |
| <i>Dactylorhiza maculata</i> (L.) Soó subsp. <i>fuchsii</i> (Druce) Hyl.                                                                                                      | Subspecies  | LC          |
| <i>Dactylorhiza maculata</i> (L.) Soó subsp. <i>maculata</i>                                                                                                                  | Subspecies  | LC          |
| <i>Dactylorhiza majalis</i> (Rchb.) P.F. Hunt & Summerh. subsp. <i>calcifugiens</i> H.A. Pedersen                                                                             | Subspecies  | NE          |
| <i>Dactylorhiza majalis</i> (Rchb.) P.F. Hunt & Summerh. subsp. <i>integrata</i> (E.G. Camus) H.A. Pedersen var. <i>integrata</i>                                             | Variety     | LC          |
| <i>Dactylorhiza majalis</i> (Rchb.) P.F. Hunt & Summerh. subsp. <i>integrata</i> (E.G. Camus) H.A. Pedersen var. <i>junialis</i> (Verm.) H.A. Pedersen                        | Variety     | VU          |
| <i>Dactylorhiza majalis</i> (Rchb.) P.F. Hunt & Summerh. subsp. <i>lapponica</i> (Hartm.) H. Sund.                                                                            | Subspecies  | RE          |
| <i>Dactylorhiza majalis</i> (Rchb.) P.F. Hunt & Summerh. subsp. <i>majalis</i>                                                                                                | Subspecies  | LC          |
| <i>Dactylorhiza majalis</i> (Rchb.) P.F. Hunt & Summerh. subsp. <i>purpurella</i> (T. & T.A. Stephenson) D.M. Moore & Soó var. <i>cambrensis</i> (R.H. Roberts) H.A. Pedersen | Variety     | LC          |
| <i>Dactylorhiza majalis</i> (Rchb.) P.F. Hunt & Summerh. subsp. <i>purpurella</i> (T. & T.A. Stephenson) D.M. Moore & Soó var. <i>purpurella</i>                              | Variety     | LC          |

|                                                                                                                                            |            |    |
|--------------------------------------------------------------------------------------------------------------------------------------------|------------|----|
| <i>Dactylorhiza majalis</i> (Rchb.) P.F. Hunt & Summerh. subsp. <i>sphagnicola</i> (Höppner) H.A. Pedersen & Hedrén                        | Subspecies | CR |
| <i>Dactylorhiza sambucina</i> (L.) Soó                                                                                                     | Species    | EN |
| <i>Epipactis atrorubens</i> (Hoffm. ex Bernh.) Besser                                                                                      | Species    | NT |
| <i>Epipactis helleborine</i> (L.) Crantz subsp. <i>helleborine</i>                                                                         | Subspecies | LC |
| <i>Epipactis helleborine</i> (L.) Crantz subsp. <i>neerlandica</i> (Verm.) Buttler var. <i>neerlandica</i>                                 | Variety    | LC |
| <i>Epipactis helleborine</i> (L.) Crantz subsp. <i>neerlandica</i> (Verm.) Buttler var. <i>renzii</i> (Rob.) J.Claess., Kleynen & Wielinga | Variety    | NT |
| <i>Epipactis leptochila</i> (Godfery) Godfery                                                                                              | Species    | NT |
| <i>Epipactis palustris</i> (L.) Crantz                                                                                                     | Species    | NT |
| <i>Epipactis phyllanthes</i> G.E. Sm.                                                                                                      | Species    | LC |
| <i>Epipactis purpurata</i> Sm.                                                                                                             | Species    | LC |
| <i>Epipogium aphyllum</i> Sw.                                                                                                              | Species    | CR |
| <i>Goodyera repens</i> (L.) R. Br.                                                                                                         | Species    | LC |
| <i>Gymnadenia conopsea</i> (L.) R. Br. subsp. <i>conopsea</i>                                                                              | Subspecies | CR |
| <i>Gymnadenia conopsea</i> (L.) R. Br. subsp. <i>densiflora</i> (Wahlenb.) K Richt.                                                        | Subspecies | CR |
| <i>Hammarbya paludosa</i> (L.) Kuntze                                                                                                      | Species    | EN |
| <i>Herminium monorchis</i> (L.) R. Br.                                                                                                     | Species    | EN |
| <i>Liparis loeselii</i> (L.) Rich.                                                                                                         | Species    | EN |
| <i>Neotinea ustulata</i> (L.) R.M. Bateman, Pridgeon & M.W. Chase                                                                          | Species    | CR |
| <i>Neottia cordata</i> (L.) Rich.                                                                                                          | Species    | LC |
| <i>Neottia nidus-avis</i> (L.) Rich.                                                                                                       | Species    | LC |
| <i>Neottia ovata</i> (L.) Bluff & Fingerh.                                                                                                 | Species    | LC |
| <i>Ophrys apifera</i> Huds.                                                                                                                | Species    | VU |
| <i>Ophrys insectifera</i> L.                                                                                                               | Species    | CR |
| <i>Orchis mascula</i> (L.) L.                                                                                                              | Species    | LC |
| <i>Orchis militaris</i> L.                                                                                                                 | Species    | NA |
| <i>Orchis purpurea</i> Huds.                                                                                                               | Species    | NT |
| <i>Platanthera bifolia</i> (L.) Rich. subsp. <i>bifolia</i>                                                                                | Subspecies | NT |
| <i>Platanthera bifolia</i> (L.) Rich. subsp. <i>latiflora</i> (Drejer) Løjtnant                                                            | Subspecies | EN |
| <i>Platanthera chlorantha</i> (Custer) Rchb.                                                                                               | Species    | NT |

|                                            |         |    |
|--------------------------------------------|---------|----|
| <i>Pseudorchis albida</i> (L.) À & D. Löve | Species | CR |
| <i>Spiranthes spiralis</i> (L.) Chevall.   | Species | RE |

234

235 Table 2. The number of observations, N, percentiles of the marginal distribution of the average change over  
 236 time (bold green numbers denotes a significant increase and bold red numbers denotes a significant  
 237 decrease),  $\beta$ , and the model (eqn. 1 or eqn. 2) that was best supported by the data.

| Species                                                | N   | 2.5 %          | 50 %           | 97.5 %         | Model |
|--------------------------------------------------------|-----|----------------|----------------|----------------|-------|
| <i>Anacamptis morio</i>                                | 433 | <b>-0,1378</b> | <b>-0,0715</b> | <b>-0,007</b>  | 2     |
| <i>Anacamptis pyramidalis</i>                          | 100 | -0,009         | 0,1233         | 0,242          | 2     |
| <i>Cephalanthera damasonium</i>                        | 137 | -0,1002        | -0,0102        | 0,0662         | 2     |
| <i>Cephalanthera longifolia</i>                        | 182 | -0,066         | -0,0265        | 0,0094         | 2     |
| <i>Cephalanthera rubra</i>                             | 60  | -0,2268        | -0,017         | 0,1976         | 2     |
| <i>Corallorhiza trifida</i>                            | 189 | <b>-0,4227</b> | <b>-0,2633</b> | <b>-0,1144</b> | 2     |
| <i>Cypripedium calceolus</i>                           | 83  | -0,1162        | -0,0157        | 0,0746         | 2     |
| <i>Dactylorhiza incarnata</i>                          | 641 | -0,2437        | -0,1155        | 0,0086         | 2     |
| <i>Dactylorhiza maculata</i> subsp. <i>fuchsii</i>     | 182 | <b>-0,0851</b> | <b>-0,0491</b> | <b>-0,0176</b> | 2     |
| <i>Dactylorhiza maculata</i> subsp. <i>maculata</i>    | 391 | -0,1085        | 0,0153         | 0,1329         | 2     |
| <i>Dactylorhiza majalis</i> subsp. <i>majalis</i>      | 928 | -0,0439        | 0,012          | 0,0666         | 2     |
| <i>Dactylorhiza majalis</i> subsp. <i>integrata</i>    | 33  | -0,1851        | 0,3126         | 0,8105         | 2     |
| <i>Dactylorhiza majalis</i> subsp. <i>purpurella</i>   | 158 | -0,1351        | -0,0363        | 0,058          | 2     |
| <i>Dactylorhiza sambucina</i>                          | 231 | <b>-0,2581</b> | <b>-0,1358</b> | <b>-0,0245</b> | 2     |
| <i>Epipactis atrorubens</i>                            | 38  | <b>-0,0823</b> | <b>-0,0599</b> | <b>-0,038</b>  | 1     |
| <i>Epipactis helleborine</i> subsp. <i>helleborine</i> | 652 | <b>-0,1575</b> | <b>-0,1173</b> | <b>-0,0781</b> | 2     |
| <i>Epipactis helleborine</i> subsp. <i>neerlandica</i> | 20  | <b>0,0058</b>  | <b>0,0228</b>  | <b>0,0404</b>  | 1     |
| <i>Epipactis leptochila</i>                            | 217 | <b>-0,1834</b> | <b>-0,1208</b> | <b>-0,0608</b> | 2     |
| <i>Epipactis palustris</i>                             | 310 | -0,3607        | -0,1382        | 0,0771         | 2     |
| <i>Epipactis phyllanthes</i>                           | 232 | <b>-0,2395</b> | <b>-0,1625</b> | <b>-0,0967</b> | 2     |
| <i>Epipactis purpurata</i>                             | 247 | -0,0742        | -0,0352        | 0,0014         | 2     |
| <i>Epipogium aphyllum</i>                              | 26  | -0,1018        | 0,0223         | 0,1545         | 2     |
| <i>Goodyera repens</i>                                 | 45  | -1,3174        | -0,5082        | 0,2319         | 2     |
| <i>Gymnadenia conopsea</i> subsp. <i>conopsea</i>      | 63  | <b>-0,2497</b> | <b>-0,1098</b> | <b>-0,0264</b> | 2     |

|                                                     |     |                |                |                |   |
|-----------------------------------------------------|-----|----------------|----------------|----------------|---|
| <i>Gymnadenia conopsea</i> subsp. <i>densiflora</i> | 20  | -0,099         | 0,0926         | 0,287          | 2 |
| <i>Hammarbya paludosa</i>                           | 122 | <b>-0,4299</b> | <b>-0,2721</b> | <b>-0,1274</b> | 2 |
| <i>Herminium monorchis</i>                          | 131 | <b>-0,3406</b> | <b>-0,1741</b> | <b>-0,004</b>  | 2 |
| <i>Liparis loeselii</i>                             | 408 | -0,124         | -0,0418        | 0,0391         | 2 |
| <i>Neotinea ustulata</i>                            | 32  | -0,1095        | 0,0433         | 0,1952         | 2 |
| <i>Neottia cordata</i>                              | 31  | -0,6676        | -0,1139        | 0,4011         | 2 |
| <i>Neottia nidus-avis</i>                           | 163 | <b>-0,116</b>  | <b>-0,0576</b> | <b>-0,002</b>  | 2 |
| <i>Neottia ovata</i>                                | 447 | <b>-0,08</b>   | <b>-0,0411</b> | <b>-0,0054</b> | 2 |
| <i>Ophrys apifera</i>                               | 21  | -0,1546        | 0,7153         | 1,5831         | 2 |
| <i>Ophrys insectifera</i>                           | 18  | <b>0</b>       | <b>0,0344</b>  | <b>0,0689</b>  | 2 |
| <i>Orchis mascula</i>                               | 795 | <b>-0,0678</b> | <b>-0,0361</b> | <b>-0,005</b>  | 2 |
| <i>Orchis militaris</i>                             | 6   | <b>-1,9705</b> | <b>-1,085</b>  | <b>-0,4714</b> | 2 |
| <i>Orchis purpurea</i>                              | 140 | -0,0725        | -0,0272        | 0,0208         | 2 |
| <i>Platanthera bifolia</i> subsp. <i>bifolia</i>    | 281 | <b>-0,3781</b> | <b>-0,2153</b> | <b>-0,074</b>  | 2 |
| <i>Platanthera bifolia</i> subsp. <i>latiflora</i>  | 82  | <b>-0,1708</b> | <b>-0,1162</b> | <b>-0,0683</b> | 2 |
| <i>Platanthera chlorantha</i>                       | 315 | -0,1442        | 0,059          | 0,2744         | 2 |
| <i>Pseudorchis albida</i>                           | 181 | <b>-0,0725</b> | <b>-0,0606</b> | <b>-0,049</b>  | 1 |

238

239

240 Table 3. The percentiles of the marginal distribution of the estimated posterior distribution of the effect of  
241 the mean estimated pressures at each site on the site-specific random time coefficients,  $\delta_i$ , of model 2.

| Effect                                        | 2.5 %  | 50 %   | 97.5 % |
|-----------------------------------------------|--------|--------|--------|
| Intercept                                     | -0.061 | 0.023  | 0.108  |
| Intensity of grazing                          | -0.009 | 0.016  | 0.040  |
| Intensity of forest management                | -0.031 | 0.006  | 0.043  |
| Overgrowth with tall-growing herbs and shrubs | -0.052 | -0.029 | -0.006 |
| Public disturbance                            | -0.038 | -0.004 | 0.030  |

242

243 **Figures**

244 Fig. 1. *Cypripedium calceolus*. The annual census of flowering aerial shoots in Buderupholm Forest 1943-  
245 2016.

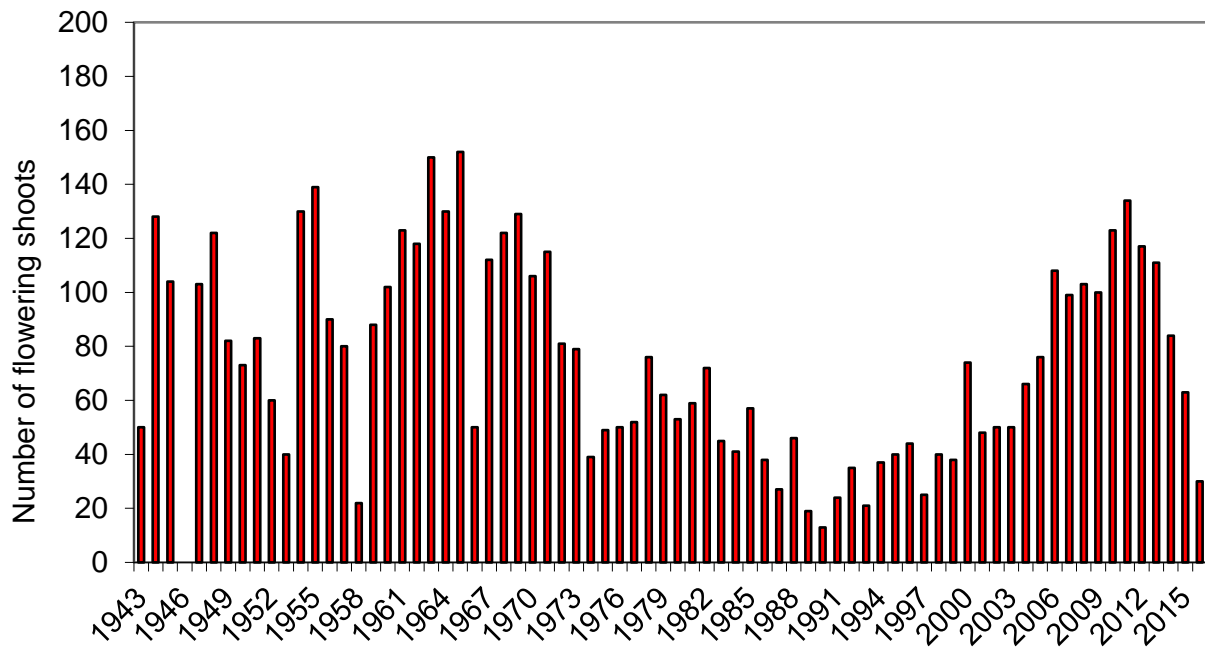

246

247 Fig. 2. Onset and continuity of the annual census of 45 Danish orchids based on the data in the Danish  
248 Orchid Database. Abbreviations: *Ana mor* – *Anacamptis morio*, *Ana pyr* – *A. pyramidalis*, *Cep dam* –  
249 *Cephalanthera damasonium*, *Cep lon* – *C. longifolium*, *Cep rub* – *C. rubra*, *Cor tri* – *Corallorhiza trifida*, *Cyp*  
250 *cal* – *Cypripedium calceolus*, *Dac inc inc* – *Dactylorhiza incarnata* subsp. *incarnata*, *Dac inc inc och* – *D. i.*  
251 *subsp. i. var. ochroleuca*, *Dac mac fuc* – *C. maculata* subsp. *fuchsii*, *Dac mac mac* – *D. m. subsp. maculata*,  
252 *Dac ma int int* – *D. majalis* subsp. *integrata* var. *integrata*, *Dac maj int jun* – *D. m. subsp. i. var. junialis*, *Dac*  
253 *maj maj* – *D. m. subsp. majalis*, *Dac maj pur cam* – *D. m. subsp. purpurella* var. *cambrensis*, *Dac maj pur pur*  
254 – *D. m. subsp. p. var. purpurella*, *Dac sam* – *D. sambucina*, *Epi atr* – *Epipactis atrorubens*, *Epi hel hel* – *E.*  
255 *helleborine* subsp. *helleborine*, *Epi hel nee* – *E. h. subsp. neerlandica*, *Epi lep* – *E. leptochila*, *Epi pal* – *E.*  
256 *palustris*, *Epi phy* – *E. phyllanthes*, *Epi pur* – *E. purpurata*, *Epi aph* – *Epipogium aphyllum*, *Goo rep* –  
257 *Goodyera repens*, *Gym con con* – *Gymnadenia conopsea* subsp. *conopsea*, *Gym con den* – *G. c. subsp.*  
258 *densiflora*, *Ham pal* – *Hammarbya paludosa*, *Her mon* – *Herminium monorchis*, *Lip loe* – *Liparis loeselii*,  
259 *Neoti ust* – *Neotinea ustulata*, *Neo cor* – *Neottia cordata*, *Neo nid* – *N. nidus-avis*, *Neo ova* – *N. ovata*, *Oph*  
260 *api* – *Ophrys apifera*, *Oph ins* – *O. insectifera*, *Orc mas* – *Orchis mascula*, *Orc mil* – *O. militaris*, *Orc pur* –  
261 *Orchis purpurea*, *Pla bif bif* – *Platanthera bifolia* subsp. *latiflora*, *Pla bi flat* – *P. b. subsp. latiflora*, *Pla chl* –  
262 *P. chlorantha*, *Pse alb* – *Pseudorchis albida*, *Spi spi* – *Spiranthes spiralis*.



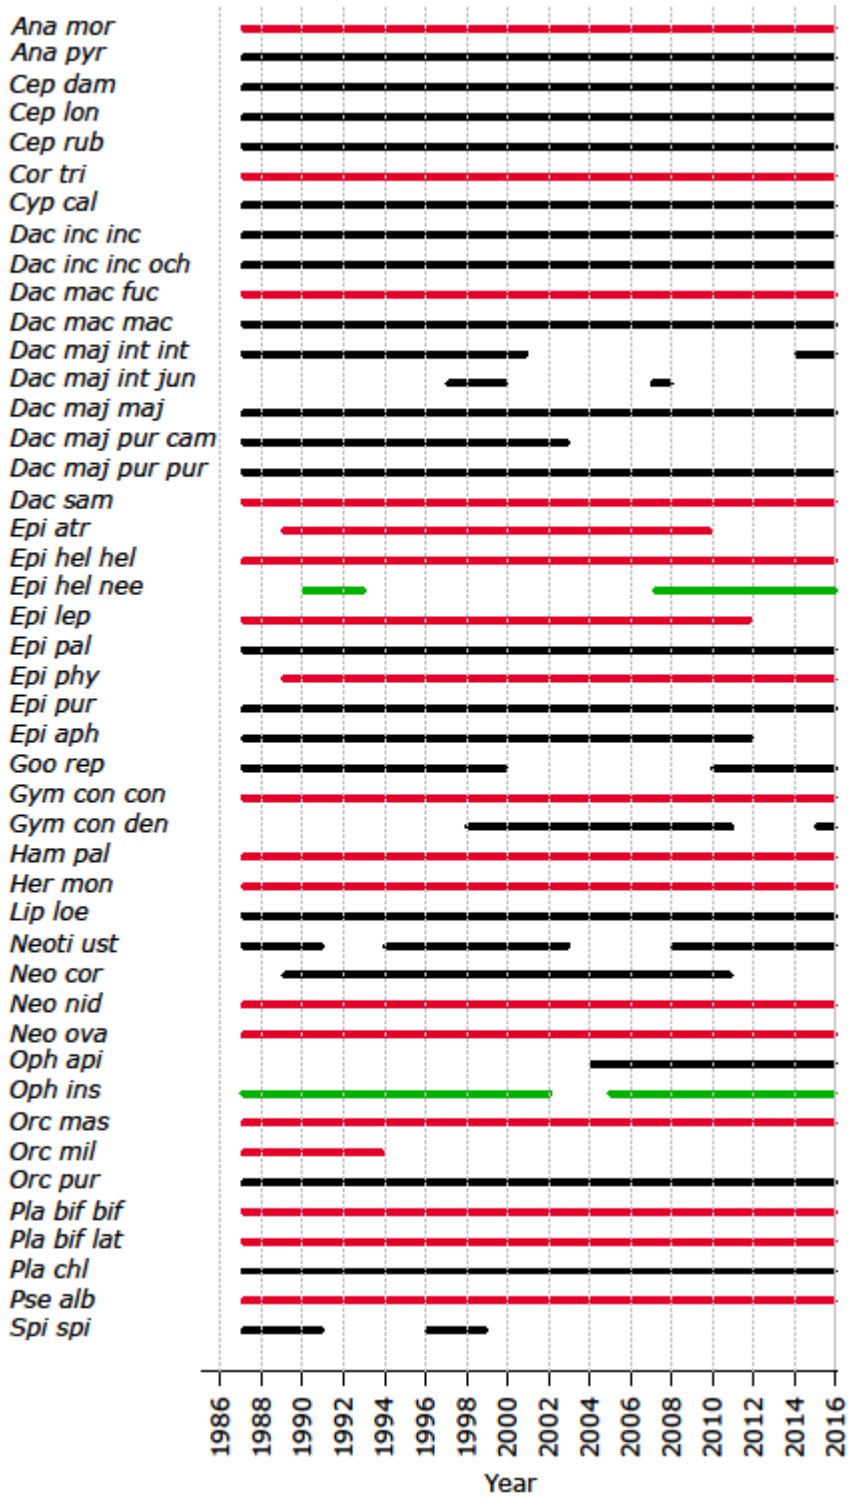

264 Fig. 3. Populations of four analysed orchids. Only populations that were monitored at least three years  
265 within the first and last ten years of the study period are shown. The size of the dots corresponds to the  
266 mean number of flowering shoots 1987–1996 showing the initial population sizes. The color gradient from  
267 green to red reflects the reduction of flowering shoots from the initial period (1987–1996) to the 2007–  
268 2016 period. The insert shows the island of Bornholm. (a): *Dactylorhiza sambucina*, (b): *Epipactis*  
269 *helleborine* subsp. *helleborine*, (c): *Herminium monorchis*, (d): *Anacamptis morio*. Photos: a, c & d Jesper  
270 Moeslund. b Peter Wind.

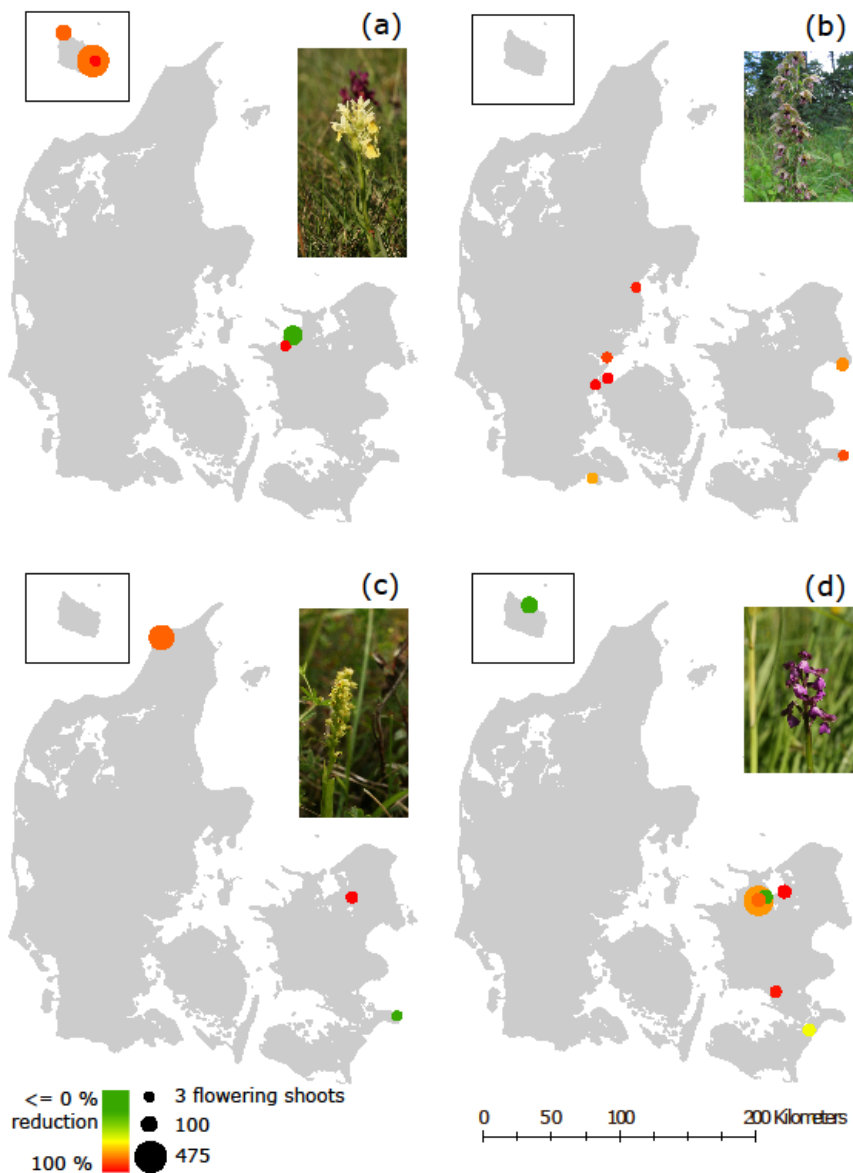

271

272 Fig. 4. The observed number of flowering shoots changes for three orchid species shown as box plots of the  
273 mean site abundance (white line: medians, yellow box: 25% - 75%, whiskers: 2.5%-97.5%, points: outliers),  
274 and the red line illustrates the estimated annual change in the linear model (2). The shown Box-plots are a  
275 summary of the hierarchical repeated-measure abundance data and cannot be eyeball-fitted to the back-  
276 transformed median slope. A: *Anacamptis morio*, B: *Dactylorhiza sambucina*, C: *Herminium monorchis*

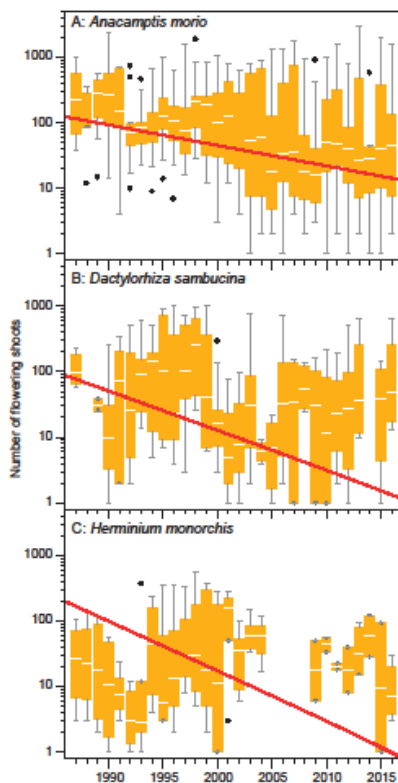

## 278 **References**

- 279 Asbirk, S., and H. Orth, editors. 1987. *Naturovervågning – rapport fra et symposium i Middelfart*. Skov- og  
280 Naturstyrelsen, Hørsholm.
- 281 Blangiardo, M., M. Cameletti, G. Baio, and H. Rue. 2013. Spatial and spatio-temporal models with R-INLA.  
282 *Spatial and Spatio-temporal Epidemiology* **4**:33-49.
- 283 Catorci, A., S. Cesaretti, and R. Gatti. 2013. Effect of long-term abandonment and spring grazing on floristic  
284 and functional composition of dry grasslands in a Central Apennine farmland. *Polish Journal of*  
285 *Ecology* **61**:505--517.
- 286 Djordjević, V., S. Tsiftsis, D. Lakušić, S. Jovanović, and V. Stevanović. 2016. Factors affecting the distribution  
287 and abundance of orchids in grasslands and herbaceous wetlands. *Systematics and Biodiversity*  
288 **14**:355-370.
- 289 Ejrnæs, R., D. N. Hansen, and E. Aude. 2003. Changing course of secondary succession in abandoned sandy  
290 fields. *Biological Conservation* **109**:343-350.
- 291 EU. 1992. Council Directive 92/43/EEC of 21 May 1992 on the conservation of natural habitats and of wild  
292 fauna and flora in E. Commission, editor.
- 293 Farrell, L. 1991. Population changes and management of *Orchis militaris* at two sites in England. Pages 63-  
294 68 in T. C. E. Wells, and J. H. Willems, editors. *Population ecology of terrestrial orchids*.
- 295 Handley, J., and B. Heidel. 2005. *Amerorchis rotundifolia* (Banks ex Pursh) Hultén (roundleaf orchid): A  
296 Technical Conservation Assessment. USDA Forest Service, Rocky Mountain Region.
- 297 Hansen, A., and A. Pedersen. 1976. *Portulacaceernes og Valerianaceernes udbredelse i Danmark*. *Bot.*  
298 *Tidsskr.* **71**:57-74.
- 299 Hartvig, P. 2015. *Atlas Flora Danica*. Gyldendal, København.
- 300 Hemrová, L., M. Kotlínek, M. Konečná, R. Paulič, J. Jersáková, T. Těšitelová, J. Knappová, and Z.  
301 Münzbergová. 2019. Identification of drivers of landscape distribution of forest orchids using  
302 germination experiment and species distribution models. *Oecologia* **190**:411-423.
- 303 Högström, S. 1991. *Kärnnycklar, Orchis palustris*, på Gotland 1982-1990. *Svensk Bot. Tidskr.* **85**:355-376.
- 304 Jessen, K. 1931. The distribution within Denmark of the higher plants. II. The distribution of the  
305 *Papilionaceae* within Denmark. *D. Kgl. Danske Vidensk. Selsk. Skrifter. Naturvidensk. Og Mathm* **9**.
- 306 Joffard, N., F. Massol, M. Grenié, C. Montgelard, and B. Schatz. 2019. Effect of pollination strategy,  
307 phylogeny and distribution on pollination niches of Euro-Mediterranean orchids. *Journal of Ecology*  
308 **107**:478-490.
- 309 Kull, T. 1999. *Cypripedium calceolus* L. *Journal of Ecology* **87**:913-924.
- 310 Kull, T. 2002. Population Dynamics of Nort Temperate Orchids in T. Kull, and J. Arditti, editors. *Orchid*  
311 *Biology: Reviews and Perspectives*, VIII. Kluwer Academic Publishers, Dordrecht/Boston/London.
- 312 Kull, T., and M. J. Hutchings. 2006. A comparative analysis of decline in the distribution ranges of orchid  
313 species in Estonia and the United Kingdom. *Biological Conservation* **129**:31-39.
- 314 Laroche, V., S. Pellerin, and L. Brouillet. 2012. White Fringed Orchid as indicator of Sphagnum bog integrity.  
315 *Ecological Indicators* **14**:50-55.
- 316 Løjtntant, B. 1991. *Overvågning af Orchideer 1987-89*. *Flora og Fauna* **97**:63-121.
- 317 Mattiasson, G. 1986. Adam og Eva dör ut inom naturreseratet Kungsmarken. *Svensk Bot. Tidskr.* **80**:17-25.
- 318 McCormick, M. K., and H. Jacquemyn. 2014. What constrains the distribution of orchid populations? *New*  
319 *Phytologist* **202**:392-400.
- 320 Miljøministeriet. 2016. *Bekendtgørelse af 27/06/2016 om fredning af visse dyre- og plantearter og pleje af*  
321 *tilskadekommet vildt in Miljøministeriet*, editor.
- 322 Newman, B. 2009. *Orchids as Indicators of Ecosystem Health in Urban Bushland Fragments*. Murdoch  
323 University.
- 324 Pedersen, H. Æ., and N. Faurholdt 2010. *Danmarks vilde orkidéer*. Gyldendal, Copenhagen.
- 325 Phillips, R. D., M. D. Barrett, K. W. Dixon, and S. D. Hopper. 2011a. Do mycorrhizal symbioses cause rarity in  
326 orchids? *Journal of Ecology* **99**:858-869.

- 327 Phillips, R. D., A. P. Brown, K. W. Dixon, and S. D. Hopper. 2011b. Orchid biogeography and factors  
328 associated with rarity in a biodiversity hotspot, the Southwest Australian Floristic Region. *Journal of*  
329 *Biogeography* **38**:487-501.
- 330 Rasmussen, H. 1995. *Terrestrial orchids from seed to mycotrophic plant*. Cambridge University Press,  
331 Cambridge.
- 332 Rocchio, J., M. March, and D. G. Anderson. 2006. *Epipactis gigantea* Dougl. ex Hook. (stream orchid): A  
333 Technical Conservation Assessment. USDA Forest Service, Rocky Mountain Region.
- 334 Rue, H., S. Martino, and N. Chopin. 2009. Approximate Bayesian inference for latent Gaussian models using  
335 integrated nested Laplace approximations (with discussion). *Journal of the Royal Statistical Society,*  
336 *Series B* **71**:319-392.
- 337 Salkowski, H.-E. 1990. 20 Jahre *Spiranthes spiralis* (L.) Chevall. Im Rabengrund bei Wiesbaden. *Ber.*  
338 *Arbeitskr. Heim. Orchid.* **7**:73-76.
- 339 Schiestl, F. P. 2005. On the success of a swindle: pollination by deception in orchids. *Naturwissenschaften*  
340 **92**:255-264.
- 341 Schrautzer, J., A. Fichtner, A. Huckauf, L. Rasran, and K. Jensen. 2011. Long-term population dynamics of  
342 *Dactylorhiza incarnata* (L.) Soó after abandonment and re-introduction of mowing. *Flora -*  
343 *Morphology, Distribution, Functional Ecology of Plants* **206**:622-630.
- 344 Spiegelhalter, D. J., N. G. Best, B. P. Carlin, and A. van der Linde. 2002. Bayesian measures of model  
345 complexity and fit. *Journal of Royal Statistical Society B* **64**:583-639.
- 346 Sterk, A. A. 1976. *Anacamptis pyramidalis* bij Wijk aan Zee. *Gorteria* **8**:81-85.
- 347 Stewart, J. 1989. La conservation des orchidées européennes. T-PVS (89) 3. Conseil de l'Europe, Strasbourg.
- 348 Stewart, J. 1996. Commercial trade. Pages 38-42, 43-44. *Orchids – status survey and conservation action*  
349 *plan*. IUCN/SCC Orchid Specialist Group, Gland and Cambridge.
- 350 Tali, K., M. F. Fay, and R. M. Bateman. 2006. Little genetic differentiation across Europe between early-  
351 flowering and late-flowering populations of the rapidly declining orchid *Neotinea ustulata*.  
352 *Biological Journal of the Linnean Society* **87**:13-25.
- 353 Tamm, C. O. 1991. Behaviour of some Orchid Population in a Changing Environment. Observations on  
354 Permanent Plots, 1943-1990. Pages 1-13 in T. C. E. Wells, and J. H. Willems, editors. *Population*  
355 *ecology of terrestrial Orchids*, The Hague.
- 356 Timmermann, A., C. Damgaard, M. T. Strandberg, and J.-C. Svenning. 2015. Pervasive early 21st-century  
357 vegetation changes across Danish semi-natural ecosystems: more losers than winners and a shift  
358 towards competitive, tall-growing species. *Journal of Applied Ecology* **52**:21-30.
- 359 van der Heijden, M. G. A., F. M. Martin, M.-A. Selosse, and I. R. Sanders. 2015. Mycorrhizal ecology and  
360 evolution: the past, the present, and the future. *New Phytologist* **205**:1406-1423.
- 361 Vanhecke, L. 1988. Veranderingen in én kustpopulatie van de Rietorchis (*Dactylorhiza praetermissa*) tussen  
362 1973 en 1985. *de Levende Natuur* **2**:44-49.
- 363 Vanhecke, L. E. M. 1991. Population dynamics of *Dactylorhiza praetermissa* in relation to topography and  
364 inundation. Pages 15-32 in T. C. E. Wells, and J. H. Willems, editors. *Population ecology of terrestrial*  
365 *orchids*.
- 366 Vestergaard, P., and K. Hansen. 1989. Distribution of vascular plants in Denmark. *Opera Botanica* **96**:1-163.
- 367 Vogt-Schilb, H., F. Munoz, F. Richard, and B. Schatz. 2015. Recent declines and range changes of orchids in  
368 Western Europe (France, Belgium and Luxembourg). *Biological Conservation* **190**:133-141.
- 369 Waite, S., and L. Farrell. 1998. Population biology of the rare military orchid (*Orchis militaris* L.) at an  
370 established site in Suffolk, England. *Botanical Journal of the Linnean Society* **126**:109-121.
- 371 Wells, T. C. E. 1981. Population ecology of terrestrial orchids. Pages 281-295 in H. Synge, editor. *The*  
372 *Biological Aspects of Rare Plants Conservation*.
- 373 Whigham, D. F. 2004. Ecology of Woodland Herbs in Temperate Deciduous Forests. *Annual Review of*  
374 *Ecology, Evolution, and Systematics* **35**:583-621.
- 375 Willems, J. H. 1989. Population dynamics of *Spiranthes spiralis* in South-Limburg, the Netherlands.  
376 *Mémoires de la Société Royale de Botanique de Belgique* **11**:115-121.

- 377 Wind, P. 1999. Overvågning af orkidéer 1998. Påvirkningsfaktorer. Arbejdsrapport. Danmarks  
378 Miljøundersøgelses, Miljø- og Energiministeriet.
- 379 Wind, P. 2019. Karplanter in J. E. m. f. Moeslund, editor. Den danske Rødliste 2019, Aarhus Universitet, DCE  
380 – Nationalt Center for Miljø og Energi.
- 381 Wood, J., M. Clements, and H. Muir. 1984. PLANTS IN PERIL, 2. The Kew Magazine **1**:139-142.

382

383

## 384 **Electronic supplements**

### 385 **Appendix A: Citizen Science in Denmark**

386 In Denmark, there is a long-time tradition for national species surveillance involving voluntary citizens. Birds  
387 were the first group of organisms to be involved in a species-monitoring program. In 1899, the Danish  
388 ornithologist Hans C.C. Mortensen (1856-1921) founded the project of ringing birds in order to follow the  
389 migration of bird species. During the 20<sup>th</sup> Century, many Danish Natural History Societies launched national  
390 surveillance programs that in a modern term are characterised as 'Citizen Science'. In 1904, The Danish  
391 Botanical Society started a complete monitoring program of the Danish flora of vascular plants – the  
392 Botanical Topographic Investigation of Denmark (TBU). The aim of the project was to gather information of  
393 the distribution and state of the Danish vascular plant flora. Officially, 262 voluntary persons participated,  
394 but more than half of them never became active (Hartvig 2015). In Denmark, 57 topographical-botanical  
395 districts were established in order to collect information that was more detailed on the vascular plant  
396 distribution. Field monitoring ended in 1923. The results of the monitoring were worked up and published  
397 in family order, starting with the *Fabaceae* (*Papilionaceae*) in 1931 (Jessen 1931). The final scientific paper  
398 on the *Portulacaceae* and the *Valerianaceae* (Hansen & Pedersen 1976) was published in 1976. In total, 41  
399 scientific papers have been published on the distribution of the Danish vascular plant flora. In 1989, a  
400 scientific paper (Vestergaard & Hansen 1989) on the general distribution pattern of the Danish vascular  
401 plant flora was issued, which formally closed the project.

402 In 1991, the Danish Botanical Society launched a follow-up project to the TBU-project called Atlas Flora  
403 Danica (AFD). The AFD project was a time-limited survey, 1991-2012, of the actual flora based on  
404 standardized method. The survey included all vascular plants, native as well as alien, outside cultivated  
405 areas. The recording units were five x five km squares in the UTM grid. A total of 2.228 squares cover  
406 Denmark. Of the 2.228 squares, 1.300 were surveyed thoroughly. The project was completed in 2015 with  
407 the publication of a three-volume book containing a presentation of the recorded vascular plant species in  
408 the project and distribution maps for most of the species (Hartvig 2015).

409 The Buderupholm Forest District (now Himmerland Forest District) started the annual census of the local  
410 population of *Cypripedium calceolus* in 1943, which is one of oldest and still ongoing surveillances of a  
411 single species. The position of the clones of *C. calceolus*, which are surrounded by a fence to protect the  
412 plants from pricking of the shoots and digging of the plants, has been mapped precisely in order to follow  
413 the development of the individual clone. The number of both vegetative and flowering aerial shoots has

414 been recorded every year since 1943, except for 1945, where only the flowering aerial shoots were  
415 counted, and 1946, where no recordings of the aerial shoots were performed at all (Figure 1).

416 Many other national surveillance terrestrial programs have been performed in Denmark, focusing on other  
417 organism groups where volunteer citizens have been involved. Examples are: 1) the national bird-  
418 monitoring program based on Point Count Census covering the trends in breeding populations of 90 species  
419 launched in 1975 and organised by the Danish Ornithological Society. 2) monitoring of amphibians and  
420 reptiles started in 1976 and is organised by the youth society 'Natur og Ungdom'. 3) monitoring of the  
421 Danish otter was launched in 1984 by World Wildlife Fund and the Danish Animal Welfare Society and is  
422 conducted in cooperation with the Natural History Museum in Aarhus (Asbirk & Orth 1987). Besides, the  
423 Danish Ornithological Society has performed three national atlas surveys of bird species in 1971 – 1974,  
424 1993- 1996 and latest in 2014 – 2017 using the same five x five km squares in the UTM grid as in the  
425 botanical AFD-project.

426



## 427 **Appendix B: The National Orchid Monitoring Program**

428 The Nature Protection Agency in cooperation with other national institutions held a symposium in October  
429 1986 in order to get an overview of the many Danish surveillance programs run by other national agencies,  
430 county counsels, universities, and natural history societies. The aim of the symposium was to get  
431 inspiration on how to work out a national terrestrial monitoring program that could support effective  
432 nature management.

433 At the turn of year 1986/1987, a fusion of the Forest Agency and the Nature Protection Agency resulted in  
434 the establishment of the Forest and Nature Agency under the Ministry of Environment. One of the first  
435 tasks of the new agency was to work out and launch a national monitoring program based on the  
436 recommendations of the 1986-symposium.

437 The National Orchid Monitoring Program, which was launched in cooperation with the Danish Botanical  
438 Society in 1987, is one example. The aim of the program is to monitor the state and possible changes in  
439 orchid abundance in representative Danish orchid populations by means of annual censuses (Løjtant  
440 1991). Besides monitoring orchid abundance, the aim of the monitoring programme is to document the  
441 effects of joint legislation on biodiversity and to collect data that may be used to understand the causal  
442 mechanisms underlying the observed changes in the state of the orchid populations.

443 The National Orchid Monitoring Program relies on volunteer citizens to conduct the annual census of the  
444 selected orchid populations in the field. Therefore, volunteers have been recruited as surveyors to carry out  
445 the annual censuses together with professionals already involved in orchid censuses. Approximately 170  
446 surveyors have contributed to the project over the past 30 years since it started in 1987 (see Appendix C).  
447 Some surveyors have contributed to the monitoring program from the beginning, whereas others have  
448 contributed for shorter periods or have joined after the onset of the program and are still involved. Sadly, a  
449 few surveyors have passed away.

450 In 1994, The National Environmental Research Institute (NERI) under the Ministry of Environment overtook  
451 the coordination and maintenance of the monitoring program. NERI had set-up the Danish Orchid Database  
452 for storing the collected data of the program and ensuring that data were accessible on the web  
453 (<http://bios.au.dk/raadgivning/natur/planter/>). When NERI was included in the Department of Bioscience  
454 at Aarhus University in 2007, the university became responsible for coordinating and maintaining the  
455 monitoring program.

## 456 **Methodology**

457 The Danish orchid expert Bernt Løjtnant was the first coordinator of the National Orchid Monitoring  
458 Program. He launched four methods for performing the annual censuses of the aerial shoots of flowering  
459 and vegetative orchid specimens. 1) A total count of all specimens in an orchid population. The benefit of  
460 the method is that the method follows the orchid population that can emerge on different locations on a  
461 site from year to year. 2) A count of all specimens within a number of randomly laid out, permanent  
462 squares on one m<sup>2</sup> or circles on 0.1 m<sup>2</sup>. 3) A total count of specimens within a permanent 'strip', e.g. 50 m  
463 in length and one m width in an orchid population. The method has been used on a large Danish population  
464 of *Liparis loeselii* on Zealand comprising thousands of plants. 4) A total count of all specimens within a  
465 permanent plot with a size of up to 100 m<sup>2</sup>. The coordinator recommended generally using the latter  
466 method (Løjtnant 1991). A disadvantage to this is that many orchids disappear from the permanent plots  
467 and appear outside of the plots. In addition, a permanent plot may vanish, especially plots established on  
468 plastic soil where the plot and the orchid population may slide into the sea. The most applied methods in  
469 the program have proved to be methods 1 and 4, where the flowering shoots are counted and, if at all  
470 possible, the vegetative shoots are counted eventually as well, although they can be hard to identify in a  
471 dense vegetation cover and difficult to identify to a particular species when more orchids grow together on  
472 the same site.

## 473 **Pressures**

474 Another important field observation is the state of the pressures, their strength and influence on the  
475 individual orchid population. The pressures comprise all factors, both natural and human, that affect the  
476 growth of an orchid population on a site. The pressures are divided into five main categories. 1) Grazing. 2)  
477 Intensity of forest management. 3) Overgrowth of tall-growing herbs and shrubs. 4) Public disturbance. 5)  
478 Other impacts (not included in the previous four).

479 1) *Grazing* comprises all kinds of impacts that grazing livestock carry out on the orchid sites. Thus, the  
480 category does not include the influence of wild animals, e.g. red deer (*Cervus elaphus*), roe deer (*Capreolus*  
481 *capreolus*) and geese (*Anser anser*). Their influence is noted in category five.

482 2) *Forest management* is the impact caused by forestry on the orchid sites. The impact includes everything  
483 from felling of selected trees over pollarding to intensive management.

484 3) *Overgrowth with tall-growing herbs and shrubs* comprises the pressure caused by the surrounding  
485 vegetation influencing the growth of an orchid population on a site. Overgrowth typically occurs where the

486 previous management has been changed or has ended. This includes all degrees of overgrowth, from  
487 increased dominance of tall-growing herbs to the growth of woody plants.

488 4) *Public disturbance* is the impact caused by recreational activities on the orchid sites. Thus, the category  
489 comprises the degree of impact caused by everything from random human damage to picking flowers for a  
490 bouquet to targeted plant collection and digging of entire plants or clones for gardening or commercial use.

491 5) The category comprises impacts caused by the use of other management practices than those described  
492 in the previous categories. A typical example is hay mowing.

493 *The Intensity of the pressures* is, as mentioned in the body text, divided into a four-step scale defined by the  
494 types of impacts and are shown in Table B1-B4.

495 Unfortunately, some of the definitions are rather weakly defined, which leaves open the possibility of  
496 subjective interpretation by the surveyors. The bias in the interpretation has caused surveyors to doubt  
497 whether to use one category or the other and induced them to have chosen to report intermediately  
498 between the two categories. The intermediate choice is inappropriate when the collected data is to be used  
499 for analysis of the degree of pressure.

500 Table B1. Degrees of impact by grazing with livestock (from Wind 1999).

| Category        | Definition                                                                                                                                                                   |
|-----------------|------------------------------------------------------------------------------------------------------------------------------------------------------------------------------|
| <b>None</b>     | The site is not grazed by livestock                                                                                                                                          |
| <b>Weak</b>     | The vegetation cover is coherent and dominated by tall-growing herbs and woody plants. Tussock and hillock structure is only seen to a lesser extent                         |
| <b>Moderate</b> | The vegetation cover is coherent and dominated by low-growing, light-dependent species. Often, a tussock and hillock structure has developed with minor vegetation less gaps |
| <b>Strong</b>   | The vegetation cover has been grazed intensively and is incoherent. Because of trampling, gaps in the vegetation cover have been created, and the                            |

|  |                                                          |
|--|----------------------------------------------------------|
|  | tussocks and hillocks are often stepped on and destroyed |
|--|----------------------------------------------------------|

501

502 Table B2. Degrees of forestry management (from Wind 1999)

| Category        | Definition                                                                                                                                                                                                                          |
|-----------------|-------------------------------------------------------------------------------------------------------------------------------------------------------------------------------------------------------------------------------------|
| <b>None</b>     | The site is characterized as natural forest or untouched forest                                                                                                                                                                     |
| <b>Weak</b>     | The picking of selected trees or coppicing is carried out extensively, whereby the forest floor is only illuminated to a small extent. Forest regeneration occurs through continuous self-regeneration of trees and shrubs          |
| <b>Moderate</b> | The picking of selected trees or coppicing is carried out to such a degree that the forest floor is partly illuminated. Forest regeneration occurs by strong self-regeneration of seed plants or by self-growth of trees and shrubs |
| <b>Hard</b>     | Clear cutting, establishment of new cultures of woody plants, cultivation of the forest floor, use of fertilizers and pesticides and heavy pruning of the forest vegetation                                                         |

503

504 Table B3. Degrees of overgrowth with tall-growing herbs and shrubs (from Wind 1999)

| Category    | Definition                                                                                                     |
|-------------|----------------------------------------------------------------------------------------------------------------|
| <b>None</b> | No sign of overgrowth on the site                                                                              |
| <b>Weak</b> | The overgrowth is so modest that, in a practical sense, it does not affect the growth of the orchid population |

|                    |                                                                                                  |
|--------------------|--------------------------------------------------------------------------------------------------|
| <b>Moderate</b>    | The overgrowth is such that it will affect the growth of the orchid population in the long term  |
| <b>Hard/strong</b> | The overgrowth is such that it will affect the growth of the orchid population in the short term |

505

506 Table B4. Degrees of public disturbance (from Wind 1999)

| <b>Category</b>    | <b>Definition</b>                                                                                            |
|--------------------|--------------------------------------------------------------------------------------------------------------|
| <b>None</b>        | Unintended traffic, pricking or digging of orchids has not been recorded                                     |
| <b>Weak</b>        | Unintended traffic in an orchid population has been recorded                                                 |
| <b>Moderate</b>    | Unintended traffic, pricking or digging of orchids has been recorded to a moderate degree                    |
| <b>Hard/strong</b> | Targeted digging of parts of or entire populations of orchids or a great degree of traffic has been recorded |

507

508 Finally, the surveyor must assess the suitability of the pressure on the orchid population. The aim of the  
 509 assessment of the suitability is to see whether the intensity of the pressure is good for the growth of the  
 510 orchid population on the site in question or whether it will harm it. Many orchid species require balanced  
 511 regulation of vegetation height and extent at the site in order for the population to thrive. For example, a  
 512 certain grazing pressure may cause the low-growing vegetation at a given site to be maintained when the  
 513 combination of bite and tramp is optimal. If grazing pressure is too high, it can cause damage to the  
 514 vegetation cover in the form of abrasion and curbing, while too low grazing pressure can cause problems in  
 515 the form of overgrazing.

516 The suitability of the intensity of the impact depends on the ecology of each orchid species. Some species  
 517 thrive best in direct sunlight, while others prefer shade. For example, the number of *Orchis mascula* and  
 518 *Neottia ovata* increases after coppicing the woodland, while the *Epipactis* and *Cephalanthera* species thrive  
 519 in untouched forest (Wind 1989).

520 When the surveyors have finished the field work, all information is noted on data sheets that are sent to  
521 the program manager at Aarhus University at the end of the season. The program manager examines the  
522 received sheets making a quality check of the information to secure its validity before the data are stored in  
523 the Danish Orchid Database.

524 In conclusion, the National Orchid Monitoring Program is an outstanding project supported by a core of  
525 surveyors, mostly volunteers, willing to perform the annual census. The program was established long  
526 before the term 'Citizen Science' was brought into everyday use. Thanks to the program, unique series of  
527 data on orchid population trends have been collected over the years, forming a more solid basis for the  
528 red-list assessment of the state of Danish orchids.

529

## 530 **Appendix C: Surveyors**

531 The surveyors that have contributed or still contribute to the National Orchid Monitoring Program are:  
532 Allan Damborg, Asta Israelsen, Allan Weimann, Aage Pedersen, Aksel Voigt, Bo Boysen Larsen, Bodil  
533 Grønborg Brun, Bjarne Hemmingsen, Bodil Holt, Birthe Kristensen, Bernt Løjtnant, Birte Hvarregaard, Bo  
534 Normander, Bodil Stoltze, Brian Rudebeck, Bent Vestergaard Petersen, Birthe Zimmermann, Carsten Horup  
535 Bille, Camilla Nielsen, Ellen & Claus Ole Madsen, Christian Roesdahl, Christian Rørdam, Christian Bertelsen,  
536 David Boertmann, Erik B. Andersen, Erik Christensen, Erik Ehmsen, Erik Hansen, Erik Hammer, Erling  
537 Krabbe, Eigil Plöger, Erik Sand, Erik Skov Nielsen, Einer T. Ludvigsen, Erik Vinther, Eiler Worsøe, Finn  
538 Bjerregaard, Finn K. Hansen, Finn Lindhart, Flemming Thorning-Lund, Gudmund Fajstrup, Gudrun Larsen,  
539 Gerda Madsen, Gerth Nielsen, Hanne Bau Jensen, Hanne Jensen, Hans Anker Nielsen, Henrik Bavnhøj,  
540 Henrik Bjørn Holck, HC Gravesen, Hans Ditlev, Hans Guldager Christiansen, Hans Hjeds, Hanne Holst, Hans  
541 Jørn Christensen, Hans Jørgen Degn, Harald K. Hansen, Helle Møller-Madsen, Henning Petersen, Henning  
542 Poulsen, Hans Rasmussen, Henrik Tranberg, Henrik Ærenlund Pedersen, Hans Øllgaard, Ian Heilmann, Inge  
543 Nagstrup, Jan Germundsen, Jan Martin, Jens Amtkjær, Jens Blædel, Jens Christensen, Jens Christian Schou,  
544 Jens Erik Lindgaard, Jens Gregersen, Jens Hohwü-Christensen, Jens Rye Larsen, Jens Vahl, Jes Phillipsen  
545 Schmidt, Jesper Ratjen, Jimmy Lassen, John Brandbyge, John Holst, John Mønsted Jensen, Johannes Skov,  
546 Jon Buttenschön, Jørgen Hyhne, Jørgen Peter Kjeldsen, Jørgen Terp Laursen, Kaj Halberg, Karen  
547 Thinggaard, Karin Sloth, Karsten Nørgaard, Kirsten Juul, Knud Rasmussen, Kurt Ærenlund Pedersen, Lars  
548 Bjarne Pedersen, Lars Christiansen, Lars Jakobsen, Lasse Werling, Lene Kofoed, Lisbeth Emsholm, Lis  
549 Kristensen, Lis Ravnsted-Larsen, Louise Lyng Bojesen, Lone Godske, Maria Mortensen, Marian Würtz  
550 Jensen, Marianne Helkjær, Mikael Landt, Mogens B. Hansen, Mogens Frost Christensen, Mogens Holmen,  
551 Morten Lyngsaa, Molly Hougaard, Niels Faurholdt, Nikolaj Hedegaard Correll, Niels Kornum, Niels  
552 Westergaard Knudsen, Nina Kjær Pedersen, Ole Lyshede, Peer Høgsberg, Per Egge Rasmussen, Peter Echard  
553 Mortensen, Peter Holm, Peter Leth, Rasmus Fuglsang Frederiksen, Rita Merete Buttenschön, Rikke Strøm-  
554 Ringstrøm, Sten Moeslund, Stig Jeppesen, Stig Mortensen, Stine Lindstrøm, Sten Asbirk, Susanne Bruhn  
555 Aaen, Søren Grøntved Christiansen, Søren Holst Kjeldsen, Søren Vinding, Terkel Arnfred, Terje Seidenfaden,  
556 Thea Illum, Thomas Eske Holm, Thomas M. Petersen, Thomas Plesner, Thomas Retsloff, Thomas Vikstrøm,  
557 Toni Reese Næsborg, Torben Ebbensgaard, Vibeke Dunn-Andersen, Vibeke Rahbek, Westy Esbensen and  
558 Aase Arbirk.

559

560

561 **Appendix D: Statistical model**

562 The two models were implemented in R-INLA as

563 `Model1=Present~Year+f(Site,model="iid")` (S1),

564 `Model2=Present~Year+f(Site,model="iid")+f(Site1,Year,model="iid")` (S2).

565 Both model were fitted by, `fit=inla(Model, data, family="poisson", E=1, control.compute=list(dic=TRUE))`

566 (S3).

567
